# Supplementary material
Source: PubMed Central journal article supplement (PMC3935383)
Supplement: NIHMS554739-supplement-2_si_001.pdf [file NIHMS554739-supplement-2_si_001.pdf]

## Supporting information:

**Table A.** Proline residue isomerization state, relative stability and protonation site of the candidate structures proposed in Figures 2 and 3.

|   | Prol <sup>3</sup> | Prol <sup>7</sup> | Potential Energy kJ/mol | Protonation Site   |
|---|-------------------|-------------------|-------------------------|--------------------|
| A | Trans             | Trans             | -1103                   | N term, Arg4       |
| B | Cis               | Cis               | -1656                   | N term, Lys1       |
| C | Trans             | Trans             | -1264                   | N term, Arg4       |
| D | Cis               | Trans             | -1624                   | N term, Lys1       |
| E | Trans             | Trans             | -1184                   | N term, Arg4       |
| F | Cis               | Cis               | -1017                   | N term, Arg4, Arg6 |
| G | Cis               | Trans             | -1288                   | N term, Lys1,Arg6  |
| H | Trans             | Cis               | -1187                   | N term, Arg4, Arg6 |
| I | Trans             | Cis               | -1310                   | N term, Lys1,Arg6  |
| J | trans             | Cis               | -1085                   | N term, Lys1,Arg6  |

Footnote: Energy comparison should be made between the same protonation sites.

**PDB files of candidate structures proposed. (separate file)**
